# Kisspeptin Excites Gonadotropin-Releasing Hormone Neurons through a Phospholipase C/Calcium-Dependent Pathway Regulating Multiple Ion Channels

Xinhuai Liu, Kiho Lee, and Allan E. Herbison

Centre for Neuroendocrinology and Department of Physiology, University of Otago School of Medical Sciences, Dunedin 9054, New Zealand

The present study used perforated-patch electrophysiology and calcium imaging in GnRH transgenic mouse lines to determine the mechanisms underlying the potent excitatory effects of kisspeptin upon GnRH neurons in the acute brain slice preparation. Kisspeptin (100 nM) depolarized ( $6 \pm 1$  mV) and/or evoked an  $87 \pm 4\%$  increase in firing rate of 75% of adult GnRH neurons ( $n = 51$ ). No sex differences were found. Analyses of input resistance and current-voltage curves indicated that a heterogeneous closure of potassium channels and opening of nonselective cation (NSC) channels was involved in kisspeptin's depolarizing response. Pharmacological pretreatment with either barium, a potassium channel blocker, or flufenamic acid, an NSC channel antagonist, reduced the percentage of responding GnRH neurons from 75 to 40% ( $P < 0.05$ ). Pretreatment with both barium and flufenamic acid reduced the response rate to 17% ( $P < 0.05$ ). To examine the

intracellular signaling cascade involved, GnRH neurons were treated with antagonists of phospholipase C (PLC), inositol-trisphosphate receptors (IP3R), and ERK1/2 before kisspeptin exposure. PLC and IP3R antagonism reduced the percentage of responding GnRH neurons from 80 to 15 and 7%, respectively ( $P < 0.001$ ). Real-time calcium imaging showed that kisspeptin evoked an approximately 10% increase in intracellular calcium levels in GnRH neurons that was followed by a decrease and return to pretest calcium levels. Additional experiments indicated that mechanisms intrinsic to the GnRH neuron are responsible for their prolonged depolarizing response to kisspeptin. These studies indicate that kisspeptin activates G protein-coupled receptor 54 (GPR54) to initiate a PLC-IP3R-calcium cascade that modulates both potassium and NSC channels to initiate depolarization in GnRH neurons. (*Endocrinology* 149: 4605–4614, 2008)

IN 2003, TWO GROUPS discovered that G protein-coupled receptor 54 (GPR54) was essential for puberty and subsequent fertility in humans (1, 2). Since that time, a substantial amount of work has been undertaken to elucidate the signaling pathways and mechanisms through which kisspeptin activates GPR54 to regulate fertility. In all species examined to date, it appears that kisspeptin neurons located within the hypothalamus provide direct excitatory inputs to GnRH neurons. Kisspeptin activates GnRH (3) and LH (4–6) secretion *in vivo*, and GnRH neurons are surrounded by kisspeptin fibers (7), express GPR54 mRNA (8, 9), and are activated intensely by kisspeptin (10). Importantly, kisspeptin is unable to stimulate LH secretion in GPR54 knockout mice (3), and kisspeptin knockout mice are infertile (11), demonstrating that kisspeptin and GPR54 are exclusive signaling partners with respect to fertility control. At present, it seems very likely that the excitatory influence of kisspeptin upon GnRH neurons is essential for puberty to proceed (6, 10), and evidence is accumulating for a similar role in ovulation (12–14).

## First Published Online May 15, 2008

Abbreviations: aCSF, Artificial cerebrospinal fluid; FFA, flufenamic acid; FI, fluorescence intensity; GFP, green fluorescent protein; GPR54, G protein-coupled receptor 54; IP3, inositol (1,4,5)-trisphosphate; IP3R, IP3 receptor; NSC, nonselective cation; PLC, phospholipase C; Ra, access resistance; Rin, input resistance; RMP, resting membrane potential; TTX, tetrodotoxin.

*Endocrinology* is published monthly by The Endocrine Society (<http://www.endo-society.org>), the foremost professional society serving the endocrine community.

In our previous electrophysiological experiments, we reported that kisspeptin was the most potent activator of GnRH neurons yet discovered (10). Patch-clamp recordings of GnRH neurons in the acute brain slice prepared from adult male and female GnRH-green fluorescent protein (GFP) transgenic mice demonstrated that a brief application of 10–100 nM kisspeptin evoked a prolonged membrane depolarization that was often accompanied by intense firing. Given the key importance of kisspeptin-GPR54 signaling to fertility, and the remarkable effects of kisspeptin on GnRH neuron excitability, it is essential that the intracellular signaling cascade initiated by GPR54 activation in GnRH neurons is established. Early studies on GPR54 expressed in HEK and CHO cells showed that this receptor was likely coupled to  $G_{q/11}$  and resulted in the activation of calcium from intracellular stores (15, 16). More recent studies examining GnRH release from juvenile female hypothalamic explants *in vitro* showed that kisspeptin's stimulatory effect was blunted by a phospholipase C (PLC) blocker and the calcium store depletor thapsigargin, in addition to ERK1/2 and p39 MAPK antagonists (17). Together, these data suggest that GPR54 uses a  $G_{q/11}$ -PLC-inositol (1,4,5)-trisphosphate (IP3)- $Ca^{2+}$  pathway to alter cellular activity. The relevance of this pathway to GPR54 activation in GnRH neurons themselves has not been established, and critically, the ion channels modulated to activate GnRH neurons are not known. The present study employed perforated patch-clamp electrophysiology and calcium imaging in GnRH transgenic mouse lines to address these issues.

Materials and Methods

Animals

Adult GnRH-GFP (18) and GnRH-Pericam (19) mice were housed under 12-h light, 12-h dark cycles (lights on at 0700 h) with *ad libitum* access to food and water. All experimentation was approved by the University of Otago Animal Welfare and Ethics Committee. The cycles of female mice were determined by vaginal smear with females being investigated on diestrus. Due to the nature of perforated-patch electrophysiological recordings, the great majority (>90%) of mice provided only a single acceptable recording. As such, the number of animals is almost identical with the number of GnRH neurons. The same is true for the calcium imaging experiments reported here where the 10 recorded neurons were obtained from eight individual mice.

Electrophysiology

Gramicidin-perforated patch recordings of GnRH neurons were undertaken at room temperature on 200- $\mu$ m-thick coronal brain slices, containing the rostral preoptic area, cut with a vibratome (Leica VT1000S). After cutting in high (6 mM) MgCl<sub>2</sub> and low (0.5 mM) CaCl<sub>2</sub> artificial cerebrospinal fluid (aCSF), slices were incubated in normal aCSF (in mM: 118 NaCl, 3 KCl, 2.5 CaCl<sub>2</sub>, 1.2 MgCl<sub>2</sub>, 11 D-glucose, 10 HEPES, 25 NaHCO<sub>3</sub>) equilibrated with 95% O<sub>2</sub>-5% CO<sub>2</sub> for about 1 h at 30 C and then more than 20 min at room temperature. Slices were transferred to a submerged recording chamber and viewed under a fixed-stage upright microscope (BX51WI; Olympus, Tokyo, Japan). Fluorescent GnRH neurons were identified under brief fluorescence illumination and patched under Nomarski differential interference contrast optics. Patch pipettes with resistances from 3–5.5 MOhms were pulled from glass capillaries (inner diameter, 1.18 mm; outer diameter, 1.5 mm) with a microelectrode puller (Sutter Instruments, Novato, CA). Gramicidin (Sigma Chemical Co., St. Louis, MO) was dissolved in methanol to a concentration of 10 mg/ml, which was diluted in the pipette solution (in mM: 145 KCl, 5 NaCl, 0.1 CaCl<sub>2</sub>, 10 HEPES, 0.5 BAPTA, pH 7.35 adjusted by KOH, ~290 mOsmol) to a final concentration of 25–75  $\mu$ g/ml just before use and then sonicated for 1–2 min. After a gigaseal was established, access resistance was monitored, and experiments in current clamp were begun when access resistance (Ra) reduced to less than 100 MOhms (36  $\pm$  1 MOhms, n = 188). The 188 GnRH neurons included in this report had an average resting membrane potential (RMP) of  $-55 \pm 1$  mV and input resistance (Rin) of 1478  $\pm$  35 MOhms. Signals (voltage and current) were amplified with a Multiclamp 700B (CV7B; Molecular Devices, Foster City, CA) and sampled online with the use of a Digidata 1440A interface (Molecular Devices) connected to a personal computer. Signals were filtered (3 or 10 kHz; Bessel filter of Multiclamp 700B) before being digitized at a rate of 1 kHz. Acquisition and subsequent analysis of the acquired data were performed with the Clampex 10 suite of software (Molecular Devices) and Origin pro 7.5 (OriginLab Corp., Northampton, MA). RMPs were the potentials recorded in current clamp without applying any holding current and were not corrected for the liquid junction potentials of about  $-2$  mV. The Rin was determined by fitting the linear part of the current-voltage (I-V) curve (in current clamp from  $-60$  to  $-90$  mV). During experiments, Ra

was monitored, and if found to change by more than 15%, the cell was discarded.

Electrophysiology analysis

A significant membrane depolarization was defined as being more than a 1.5-mV change from the baseline. To compare the kisspeptin-induced changes in the frequency of action potentials, the percentage change in firing frequency was calculated as follows:  $100 \times [(frequency\ during\ test - frequency\ during\ control) / frequency\ during\ test]$ . In this way, silent cells induced to fire had a maximum increase in frequency of 100%. Data for the duration of kisspeptin responses was determined from those cells in which membrane potential returned to pretest levels within 30 min of the kisspeptin application. Some GnRH neurons do not return to baseline levels during the entire recording period, which can be more than 60 min. However, statistically useful data collection on the duration of kisspeptin effects becomes limited by the period of time within which the majority of GnRH neurons can be held in an acceptable perforated-patch mode. Based on our previous experience, we have set this to be 30 min because we find that 95% of recordings can be maintained for this period. Because kisspeptin can be applied to any GnRH neuron (or brain slice) only once, pharmacological analyses were undertaken by assigning brain sections to control or specific drug treatments and the percentage of responding cells analyzed using Fisher's exact test. Data are expressed as mean  $\pm$  SEM.

Calcium imaging and analysis

This was undertaken as reported previously (19) with slight modifications. In brief, 200- $\mu$ m-thick coronal brain slices were prepared from adult female GnRH-Pericam mice as detailed above for electrophysiological experiments using the same aCSF. Slices were placed in a tissue chamber perfused with oxygenated aCSF (22  $\pm$  1 C) at a rate of 2–3 ml/min. Cells were imaged using an Olympus BX51 upright microscope (Tokyo, Japan). Excitation was performed by exposing slices to 415 nm wavelength for 200 msec every second and emission filtered at 525 nm with the use of a Sutter Instruments  $\lambda$  DG-4 high-speed filter unit. Images were acquired using Metafluor to control and synchronize the DG-4 and liquid-cooled ORCA-ER CCD camera (Hamamatsu, Japan). Fluorescence intensity (FI) values were exported for a region of interest on the cell and one of the same area on the background and analyzed with Origin Pro 7.5. The baseline calcium level was obtained by dividing the difference between the FI cell (Fc) and the FI background (Fb) by Fb:  $[baseline\ [Ca^{2+}]_i = (Fc - Fb) / Fb]$ . This was calculated for every measurement and the percent change in baseline calcium evoked by kisspeptin determined by the following formula:  $[(peak\ evoked\ [Ca^{2+}]_i - mean\ of\ 1-min\ pretest\ [Ca^{2+}]_i) / mean\ of\ 1-min\ pretest\ [Ca^{2+}]_i] \times 100$ .

Drugs

The different drugs used for experiments are shown in Table 1. All compounds were obtained from Sigma with the exception of kisspeptin and PD98059 from Calbiochem (San Diego, CA) and tetrodotoxin (TTX) from Tocris (Ellisville, MO). Stock solutions were prepared in dimeth-

TABLE 1. List of drugs (in order of appearance in the text)

| Name of drug     | Formula                                                                                      | Activity                                                |
|------------------|----------------------------------------------------------------------------------------------|---------------------------------------------------------|
| Kisspeptin       |                                                                                              | GPR54 agonist                                           |
| Antide           |                                                                                              | GnRH receptor antagonist                                |
| Kynurenic acid   |                                                                                              | Broad-spectrum ionotropic glutamate receptor antagonist |
| Picrotoxin       |                                                                                              | GABA <sub>A</sub> receptor antagonist                   |
| TTX              |                                                                                              | Voltage-dependent sodium channel blocker                |
| Ba <sup>2+</sup> |                                                                                              | Broad-spectrum potassium channel blocker                |
| FFA              |                                                                                              | NSC channel antagonist                                  |
| U73122           | 1-[6-([(17 $\beta$ )-3-Methoxyestra-1,3,5 [10]-trien-17-yl)amino]hexyl]-1H-pyrrole-2,5-dione | PLC antagonist                                          |
| U73343           | 1-[6-([(17 $\beta$ )-3-Methoxyestra-1,3,5[10]-trien-17-yl)amino]hexyl]-2,5-pyrrolidinedione  | Inactive analog of U73122                               |
| 2-APB            | 2-Aminoethoxy diphenyl borate                                                                | IP3R antagonist                                         |
| PD98059          | 2'-Amino-3'-methoxyflavone                                                                   | ERK1/2 antagonist                                       |

ylsulfoxide at the concentrations indicated and stored at  $-20^{\circ}\text{C}$ : 2-APB (100 mM), kisspeptin (2 mM), PD98059 (20 mM), U73122 (5 mM), and U73343 (5 mM). The final dimethylsulfoxide concentrations were less than 0.2% (vol/vol). Stock solutions of TTX (0.5 mM) and antide (100 mM) were prepared with distilled water and stored at  $-20^{\circ}\text{C}$ . Flufenamic acid (FFA) was diluted in ethanol at 100 mM before use, and final ethanol concentration was 0.1% (vol/vol). All drugs were applied in perfusion solution with final concentration as indicated.

## Results

To ensure that electrophysiological recordings were made from GnRH neurons in which their intracellular milieu was undisturbed, we used current- and voltage-clamp, perforated-patch recordings with  $R_a$  less than  $40\text{ M}\Omega$ . Our previous study demonstrated that 100 nM kisspeptin is an effective and direct activator of GnRH neurons in the acute brain slice preparation (10).

### *Kisspeptin activates the majority of GnRH neurons in both male and female mice*

In the first series of experiments, kisspeptin (100 nM for 2–4 min) was applied to 51 GnRH neurons recorded in current clamp and held at their RMP. Of these, 38 (74.5%) responded to kisspeptin with depolarization ( $6.4 \pm 0.9\text{ mV}$ ;  $n = 35$ ) and/or an increase in firing of action potentials ( $0.12 \pm 0.07$  to  $0.68 \pm 0.13\text{ Hz}$ , increase of  $87.1 \pm 4.3\%$ ;  $n = 18$ ). Kisspeptin depolarized GnRH neurons within 90 sec of application, and for those GnRH neurons returning to pretest membrane potential levels within 30 min (see *Materials and Methods*), the depolarization lasted on average for  $20.8 \pm 2.8\text{ min}$  ( $n = 13$ ; Fig. 1A). Thirteen cells were tested with a subsequent application of 100 nM kisspeptin once they had returned to baseline RMP, but none responded (Fig. 1B).

No sex differences were found in the effects of kisspeptin on adult GnRH neurons (Fig. 1C). We found that 76% of diestrous female GnRH neurons ( $n = 25$ ) responded to kisspeptin compared with 77% in males ( $n = 47$ ). No difference was detected in the evoked depolarization ( $6.4 \pm 0.8\text{ mV}$  in females,  $n = 19$ ;  $7.3 \pm 1.0\text{ mV}$  in males,  $n = 32$ ) or evoked increase in firing ( $0.12 \pm 0.11$  to  $0.76 \pm 0.14$ ,  $90 \pm 6\%$  increase in 13 female GnRH neurons;  $0.07 \pm 0.04$  to  $0.59 \pm 0.12$ ,  $90 \pm 3\%$  increase in 16 male GnRH neurons) (Fig. 1C).

### *Kisspeptin initiates a prolonged depolarization that depends upon intrinsic properties of GnRH neurons*

To assess the mechanisms responsible for the prolonged nature of the kisspeptin-evoked depolarization, we examined the effects of antide, TTX, and amino acid receptor blockers. Antide, the GnRH receptor antagonist, was tested to examine whether GnRH neurons maintain their depolarized state by mutual or auto-excitation through collateral innervation. We have previously shown that 100 nM antide completely blocks the effects of GnRH on GnRH neurons (20). TTX was used to examine, more generally, whether action potential-dependent transmission from recurrent feedback loops were involved in the prolonged excitation. Finally, the amino acid receptor blockers kynurenic acid (1 mM, broad-spectrum ionotropic glutamate receptor antagonist) and picrotoxin (0.1 mM, GABA<sub>A</sub> receptor antagonist)

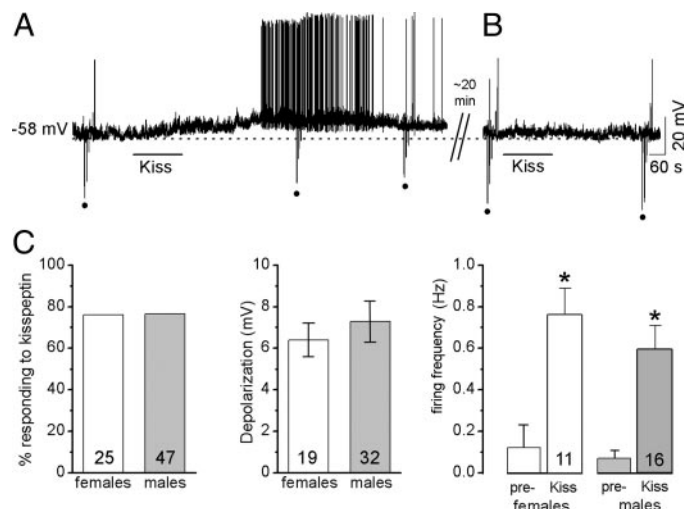

FIG. 1. Kisspeptin depolarizes GnRH neurons. Note that for all figures, the upward and downward deflections (dots) from the voltage traces are responses to the injection of hyperpolarizing or depolarizing currents to test membrane resistance. Drug applications are indicated by the horizontal line above or under traces. A, Representative voltage trace showing kisspeptin depolarization of a GnRH neuron with a decrease in  $R_{in}$ . Note that responses to current injections (dots) are smaller during kisspeptin than those during control. B, The same cell approximately 40 min after the initial kisspeptin test does not respond to a second kisspeptin application. C, Histograms showing no differences between diestrous females and males in the percentage of GnRH neurons that respond to kisspeptin, the degree of depolarization evoked by kisspeptin, or the increase in firing frequency evoked by kisspeptin. Kiss, Firing rate during kisspeptin application; Pre-, firing rate before kisspeptin. \*,  $P < 0.001$  compared with pre-, paired Student's  $t$  test. The numbers (n) are given at the base of each histogram.

were used as a cocktail to examine the role of action potential-dependent and -independent amino acid transmission.

Antide (100 nM for 4 min), applied before ( $n = 10$ ) or after kisspeptin ( $n = 10$ ; Fig. 2A) treatment, did not change the response of GnRH neurons to kisspeptin. After pretreatment with antide, kisspeptin depolarized ( $6.2 \pm 1.3\text{ mV}$ , duration  $20.5 \pm 1.3\text{ min}$ ) six of 10 GnRH neurons and increased firing frequency by  $84 \pm 6\%$ . For cells in which antide was administered after the kisspeptin activation, no effect on membrane potential or firing rate was found (Fig. 2A), and the duration of the response remained unaltered ( $21.2 \pm 1.1\text{ min}$ ).

TTX administered to GnRH neurons ( $n = 3$ ) after their activation by kisspeptin was found to block action potential generation but had no effect upon the magnitude or length ( $23 \pm 5\text{ min}$ ) of membrane depolarization (Fig. 2B).

The amino acid blocker cocktail blocked postsynaptic potentials in GnRH neurons (Fig. 2C) but had no effect upon the kisspeptin responses of GnRH neurons. Of 21 GnRH neurons tested, 17 (81%) responded to kisspeptin with a depolarization ( $8.1 \pm 0.9\text{ mV}$ , duration  $22.8 \pm 2.9\text{ min}$ ;  $n = 15$ ) and/or an increase in firing ( $0.03 \pm 0.04$  to  $0.61 \pm 0.10\text{ Hz}$ , increased by  $94.9 \pm 2.8\%$ ,  $n = 9$ ; Fig. 2C).

Together, these observations suggest that the prolonged depolarizing response of GnRH neurons to kisspeptin is an intrinsic mechanism not dependent upon external neural transmission.



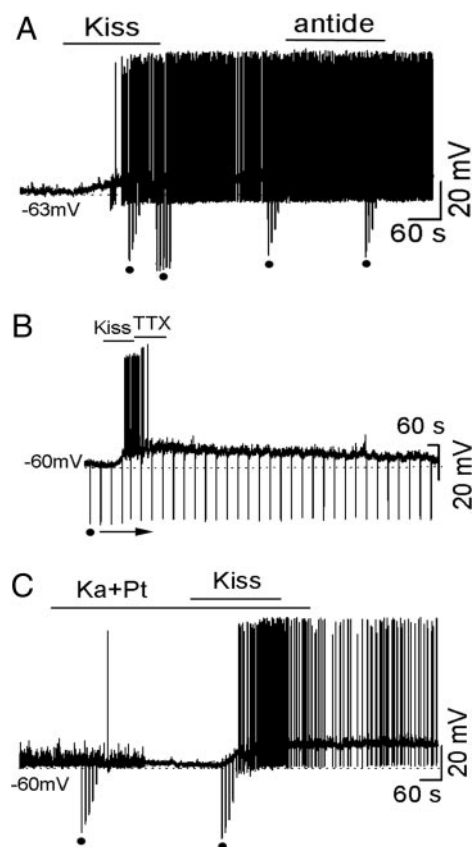

FIG. 2. Kisspeptin excites GnRH neurons via an intrinsic mechanism independent of external neural transmission. A, Representative voltage trace showing kisspeptin-induced depolarization and firing was not affected by antide (100 nM) administered during the kisspeptin activation; B, representative voltage trace showing kisspeptin-induced depolarization was not affected by TTX (0.5  $\mu$ M administered during the kisspeptin activation; C, representative voltage trace showing kynurenic acid (1 mM) and picrotoxin (0.1 mM) (Ka+Pt) blocking synaptic events but having no effect on the kisspeptin-induced depolarization.

#### Potassium and nonselective cation (NSC) channels underlie kisspeptin's depolarizing effects on GnRH neurons

To identify the ion channels underlying kisspeptin's initial depolarizing effects, 40 GnRH neurons held at  $-60$  mV in current clamp were tested with 100 nM kisspeptin. Before, and at different times after kisspeptin administration, current clamp was switched to voltage clamp to establish the I-V curve. On the basis of Rin change and the reversal potential of the current induced by kisspeptin, we found that GnRH neurons could be classified into three groups: 1) depolarization with an increase in Rin and reversal potential of  $-93 \pm 2.8$  mV (Fig. 3, A and B;  $n = 6$ ), which was suggestive of a depolarizing mechanism involving the closing of  $K^+$  channels; 2) depolarization with a decrease in Rin and reversal potential of  $-10 \pm 5.1$  mV (Fig. 3, C and D;  $n = 7$ ), which suggested that the depolarization occurred through the opening of NSC channels; and 3) depolarization without a constant change in Rin or reversal potential (Fig. 3, E and F;  $n = 27$ ). This could occur through the opening and/or closing of multiple ion channels. For all three types of response, the same Rin and I-V curve was found regardless of when it was assessed after application of kisspeptin.

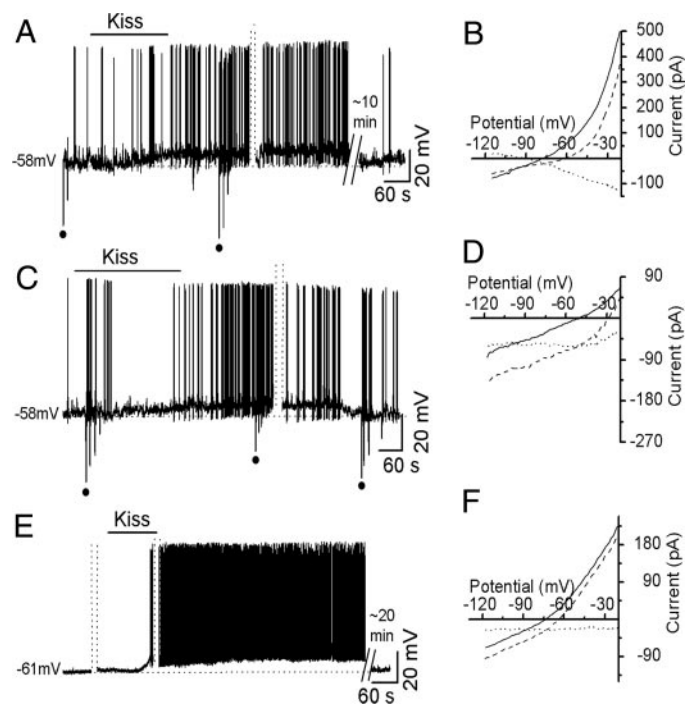

FIG. 3. Kisspeptin depolarizes GnRH neurons by affecting multiple ion channels. Dotted parallel lines indicate the switch from current to voltage clamp to establish I-V curves (3- to 5-min duration), and omitted voltage sections are also indicated. A, Representative voltage trace showing kisspeptin depolarizing a GnRH neuron with an increase in Rin. The duration of depolarization is about 26 min. B, I-V curves established by running a ramp from  $-20$  to  $-120$  mV for 4 sec in voltage clamp: solid line, an I-V curve obtained before kisspeptin; dashed line, an I-V curve during kisspeptin action; dotted line, an I-V curve obtained by the point-by-point subtraction of currents during kisspeptin from those of control at corresponding potentials mathematically (the same for E and F). This shows that a kisspeptin-induced current reversed at  $-95$  mV. C, Representative voltage trace showing kisspeptin depolarizing a GnRH neuron with a decrease in Rin [responses to current injections (dots) are smaller during kisspeptin than control]. D, I-V curves and dotted line showing kisspeptin-induced current reversed at about  $-10$  mV (estimated by extrapolating). E, Representative voltage trace showing kisspeptin depolarizing a GnRH neuron without any change in Rin (see I-V curves in F). Note the kisspeptin application indication line is shorter than 3 min due to omitted trace during voltage recording. F, I-V curves and dotted line showing kisspeptin-induced current did not reverse between  $-20$  and  $-120$  mV.

Because these observations suggested that potassium and NSC channels were involved in the kisspeptin response, we undertook a pharmacological analysis of kisspeptin action using  $Ba^{2+}$ , a broad-spectrum potassium channel blocker, and 0.1 mM FFA, an NSC channel antagonist (21, 22). Because kisspeptin can be applied only once to a GnRH neuron, brain slices were attributed to control (no drug),  $Ba^{2+}$  alone, FFA alone, or both ( $Ba^{2+}$  + FFA) treatments. The percentage of responding cells was determined and tested for significant differences by Fisher's exact test.

**Controls.** In total, 38 of 51 (75%) control GnRH neurons given no pharmacological pretreatment responded to kisspeptin.

**$Ba^{2+}$ .**  $Ba^{2+}$  applied to 27 GnRH neurons was found to depolarize most cells ( $n = 23$ ) by itself ( $7.5 \pm 1.1$  mV depolarization with a  $78 \pm 7\%$  increase in firing) suggest-

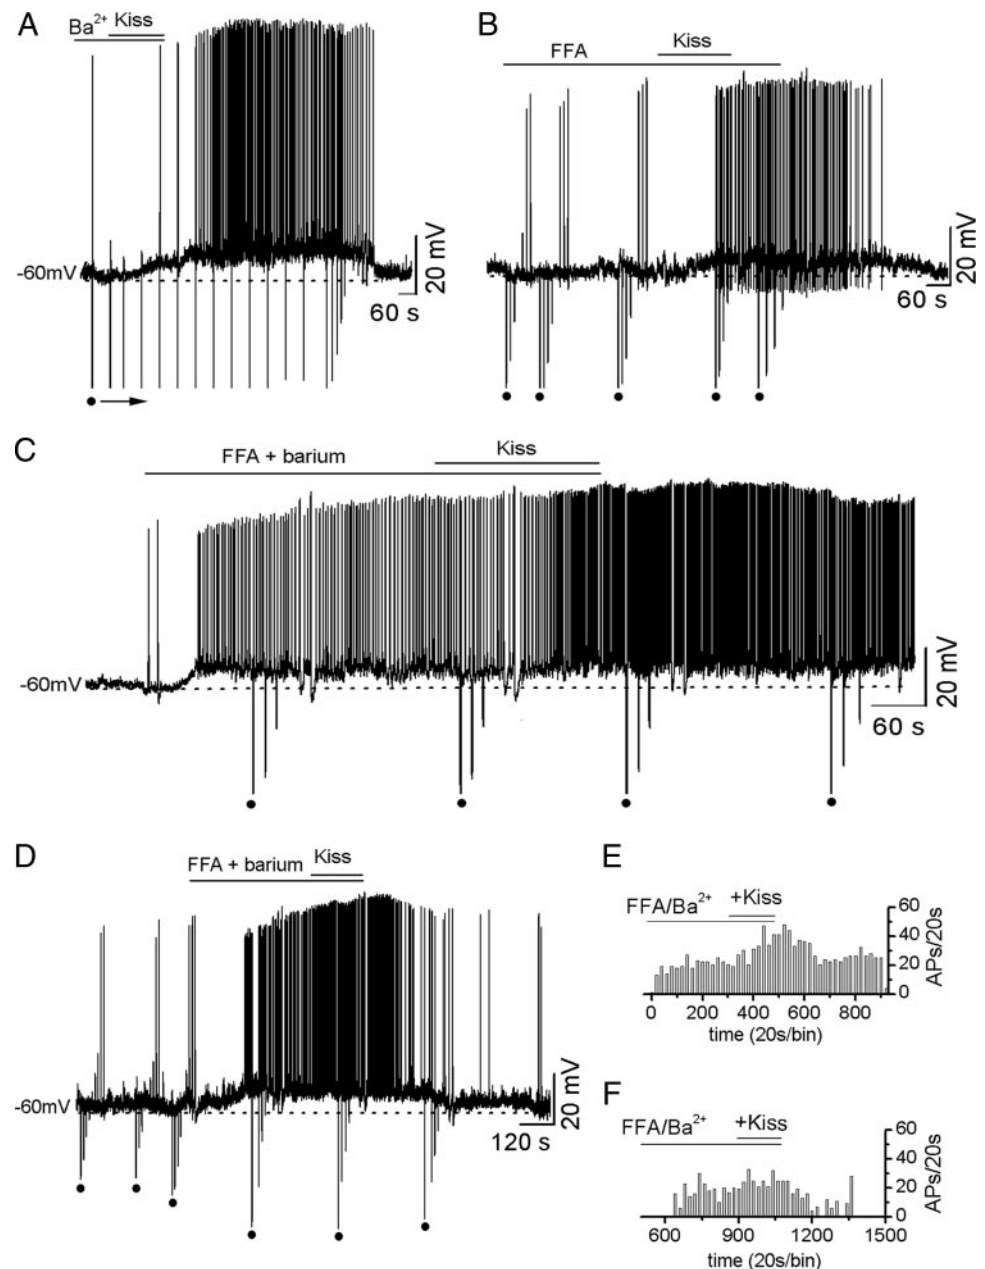

FIG. 4.  $Ba^{2+}$  and FFA decrease the number of kisspeptin-responsive GnRH neurons. A, Representative voltage trace showing kisspeptin depolarizing a GnRH neuron in the presence of  $Ba^{2+}$  with an increase in Rin. The depolarization induced by 3 min preapplication of 1 mM  $Ba^{2+}$  was removed by injected current (not shown) and then 100 nM kisspeptin applied as indicated. B, A representative voltage trace showing kisspeptin depolarizing another GnRH neuron in the presence of 0.1 mM FFA with an increase in Rin. Note that a 5-min preapplication of FFA did not change membrane potential. C, A voltage trace showing one of the two GnRH neurons still responding to kisspeptin in the presence of FFA +  $Ba^{2+}$ . Preapplication of FFA +  $Ba^{2+}$  depolarized the cell with an increase in Rin. Note that kisspeptin had no further effect on membrane depolarization but increased the frequency of action potentials (see E). D, Representative voltage trace showing typical effect of kisspeptin being unable to activate GnRH neurons in the presence of  $Ba^{2+}$  + FFA. In this case, the  $Ba^{2+}$  + FFA depolarizes the cell and makes it fire, but kisspeptin has no further effect. E and F, Ratemeter histograms of action potential firing rate (20-sec bins) for the two cells shown in C and D, respectively.

ing that most all GnRH neurons have tonically active  $Ba^{2+}$ -sensitive potassium channels restraining their excitability. Kisspeptin (100 nM) applied in the presence of  $Ba^{2+}$  (with or without the membrane potential being held back to control levels) still depolarized 8 of 18 (44%) GnRH neurons ( $n = 18$ ; Fig. 4A) by  $5.9 \pm 1.3$  mV ( $n = 8$ ) and increased firing frequency by  $38 \pm 14\%$  ( $n = 8$ ). The other 10 GnRH neurons showed no response to kisspeptin. The decrease in the % of GnRH neurons depolarized by kisspeptin in the presence of  $Ba^{2+}$  (44% vs. controls 75%) was significantly different ( $P < 0.05$ ; Fig. 5A).

**FFA.** FFA itself was found to have no effects upon the majority (85%) of recorded GnRH neurons (Fig. 4B) with the remaining 15% showing either small depolarizations or hyperpolarizations. When kisspeptin was applied after FFA, 6

of 14 (43%) of GnRH neurons responded in the normal manner with an increase in membrane potential ( $5.1 \pm 0.7$  mV;  $n = 5$ ) and/or an increase in firing frequency of  $59 \pm 22\%$  ( $n = 4$ ; Fig. 4B). The remaining 8 GnRH neurons showed no response to kisspeptin. The decrease in the % of GnRH neurons depolarized by kisspeptin in the presence of FFA was significantly different compared with controls ( $P < 0.05$ ; Fig. 5A).

**$Ba^{2+}$  + FFA.**  $Ba^{2+}$  and FFA applied together were found to depolarize GnRH neurons in the same way described for  $Ba^{2+}$  alone (Fig. 4C). Kisspeptin (100 nM) applied in the presence of  $Ba^{2+}$  + FFA depolarized and/or increased the firing rate of two of 12 GnRH neurons (17%) (Fig. 4, C and E) with the remainder being unresponsive (Fig. 4, D and F). The decrease in the percentage of GnRH neurons depolarized by

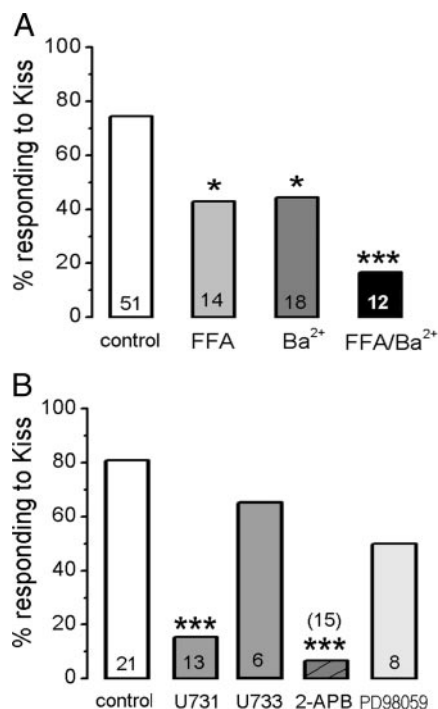

FIG. 5. Histograms showing the percentage of GnRH neurons responding to kisspeptin in the presence of different antagonists. A, Ion channel experiments. B, Intracellular signaling cascade experiments. control = cells tested with kisspeptin without antagonists; U731 = U73122; U733 = U73343. Total number of cell tested is given at base of each histogram. \*,  $P < 0.05$ ; \*\*\*,  $P < 0.001$  compared with control (Fischer's exact test).

kisspeptin in the presence of Ba<sup>2+</sup>+FFA was significantly different compared with controls ( $P < 0.001$ ; Fig. 5A).

#### Kisspeptin requires PLC and IP3 receptors (IP3R) to activate GnRH neurons

To evaluate the intracellular signaling pathway responsible for kisspeptin's depolarizing actions, a pharmacological approach was employed by using blockers of PLC (U73122 and its inactive analog U73343) (23), IP3R (2-APB) (24), and ERK1/2 (PD98059) (25). To try and isolate effects of these compounds to GnRH neurons, while retaining the ability to observe action potentials, these experiments were undertaken in the presence of the amino acid receptor antagonists kynurenic acid and picrotoxin. Because kisspeptin can be applied only once to a GnRH neuron, brain slices were attributed to control (no drug), U73122, U73343, 2-APB, or PD98059 treatments and the percentage of responding cells determined and tested by Fisher's exact test.

**Controls.** In total, 17 of 21 control GnRH neurons (80%) pretreated with kynurenic acid and picrotoxin responded to kisspeptin. The cocktail of amino acid blockers themselves resulted in depolarizations in about 15% of GnRH neurons.

**U73122.** Pretreatment (8–15 min) with 10  $\mu$ M U73122 resulted in two of 13 GnRH neurons (15%) responding to kisspeptin with depolarization or increased firing with the remainder being unresponsive (Fig. 6A). This response rate was significantly different compared with controls (Fig. 5B);

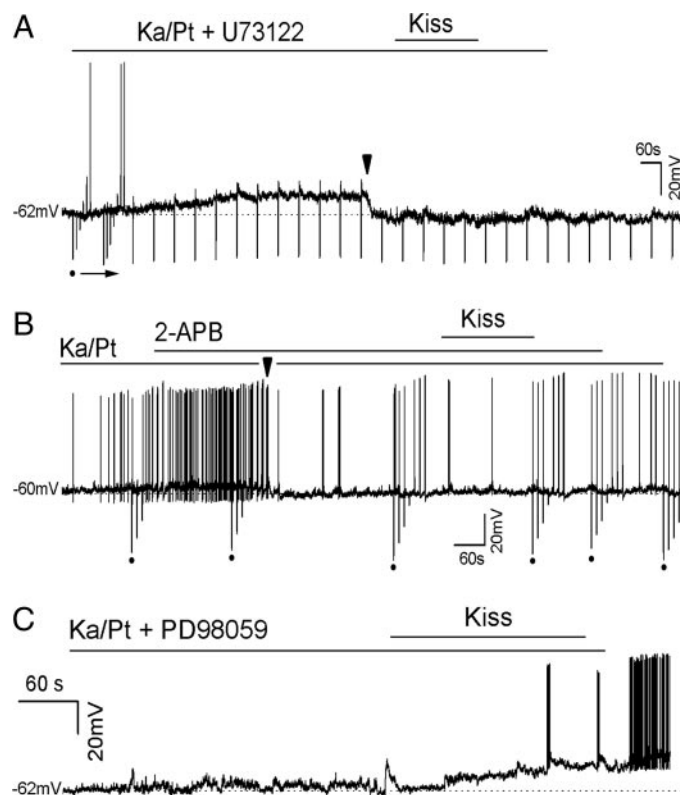

FIG. 6. Intracellular signaling cascade involved in mediating kisspeptin depolarization of GnRH neurons. All experiments were undertaken in the presence of the amino acid blockers 1 mM kynurenic acid and 0.1 mM picrotoxin (Ka/Pt). A, Representative voltage trace showing a GnRH neuron that fails to respond to 100 nM kisspeptin after pretreatment with 10  $\mu$ M U73122. Note that the Ka/Pt/U73122 cocktail progressively depolarized the cell and that it was held back to control RMP level by injecting current at the arrowhead. B, Representative example of a GnRH neuron that fails to be activated by kisspeptin after 10 min pretreatment with 100  $\mu$ M 2-APB. Note that Ka/Pt depolarized the cell progressively and that it was held back to its control RMP by injecting current (arrowhead). C, Representative example of a voltage trace of a GnRH neuron that was activated by kisspeptin despite pretreatment with 20  $\mu$ M PD98059.

$P < 0.001$ ). Treatment with U73343, the inactive analog, resulted in four of six (67%;  $P > 0.05$ ) GnRH neurons responding to kisspeptin (Fig. 5B).

**2-APB.** Pretreatment (10 min) with 100  $\mu$ M 2-APB had no consistent effect on GnRH neuron membrane potential but resulted in only one of 15 GnRH neurons (7%) responding to kisspeptin with the remainder being unresponsive (Fig. 5B). This response rate was significantly different from that of controls ( $P < 0.001$ ).

**PD98059.** Pretreatment (5 min) with 20  $\mu$ M PD98059, which again had no consistent effect on membrane potential itself, resulted in four of eight GnRH neurons (50%) responding to kisspeptin with depolarization ( $8.6 \pm 2.5$  mV,  $n = 4$ ) and an increase in firing (Fig. 6C). This was not significantly different compared with controls (Fig. 5B).

#### Kisspeptin initiates an increase and then a decrease in $[Ca^{2+}]_i$

Because the electrophysiology results suggested that kisspeptin was likely to activate an increase in  $[Ca^{2+}]_i$ ,



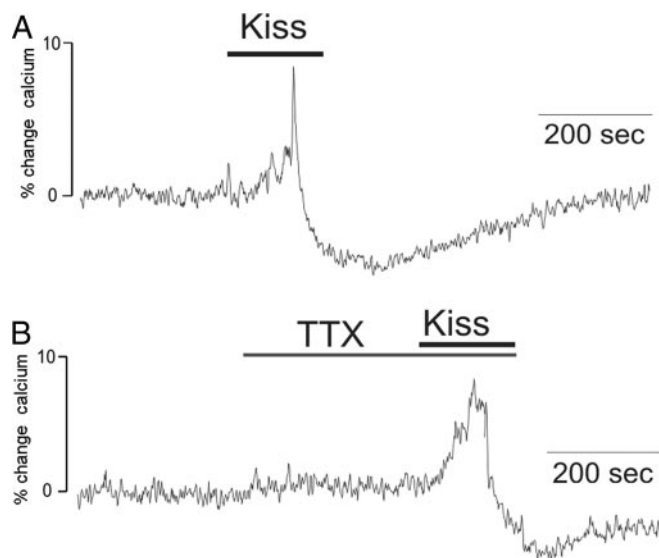

FIG. 7. Kisspeptin alters intracellular calcium levels in GnRH neurons. Traces showing the effects of 100 nM kisspeptin upon  $[Ca^{2+}]_i$  in GnRH neurons of GnRH-Pericam transgenic mice. The trace shows the percent change in  $[Ca^{2+}]_i$ , calculated by determining  $[Ca^{2+}]_i$  every second and comparing it with the mean  $[Ca^{2+}]_i$  levels in the 1 min before the testing period. A, Representative trace showing a GnRH neuron responding to kisspeptin with an increase in  $[Ca^{2+}]_i$ , followed by a sudden decline and slow recovery; B, GnRH neuron pretreated with TTX showing the same response to 100 nM kisspeptin.

through PLC activating IP3R, we used GnRH-Pericam mice to examine the effect of kisspeptin upon  $[Ca^{2+}]_i$  in GnRH neurons. The GnRH-pericam transgenic line allows real-time imaging of  $[Ca^{2+}]_i$  in GnRH neurons in the acute brain slice preparation (19).

Kisspeptin at 100 nM was found to evoke a rise in  $[Ca^{2+}]_i$  immediately after entry into the bath in six of six female GnRH neurons (Fig. 7A). An increase in  $[Ca^{2+}]_i$  peaking at  $11 \pm 3\%$  above pretest baseline levels lasted for 2–3 min and was then followed by a sudden drop in  $[Ca^{2+}]_i$  before levels gradually returned to basal concentrations (Fig. 7A). Four female GnRH neurons were tested with kisspeptin in the presence of 0.5  $\mu$ M TTX, and three responded (75%) with a similar profile including an  $11 \pm 5\%$  baseline increase in  $[Ca^{2+}]_i$  (Fig. 7B). The remaining cell did not display any change in  $[Ca^{2+}]_i$ .

### Discussion

Kisspeptin is a remarkably potent activator of GnRH neurons. As noted in our initial study (10), and also reported recently by others (26), a short application of 10–100 nM kisspeptin generates a 5- to 10-mV depolarization that is prolonged, lasting for at least 20 min. However, this response appears to desensitize quickly because GnRH neurons no longer respond to kisspeptin 20–30 min after the first application. Given the potent effects of kisspeptin on GnRH neuron excitability, this desensitization may be important in preventing GnRH neurons from overexcitation. It is not known how long this period of desensitization lasts, but it is important to note that hourly kisspeptin administration can initiate LH pulses over several hours in the monkey (27). This suggests that the GPR54 expressed by GnRH neurons can be

reactivated after 60 min *in vivo*. It will be interesting in future studies to determine the mechanism of GPR54 desensitization in GnRH neurons.

Although sex differences exist in the expression of kisspeptin protein and mRNA within the rostral preoptic area (28, 29), we have not found any sex differences in the percentage of GnRH neurons responsive to kisspeptin or in the dynamics of their response. This suggests that GPR54 expression by GnRH neurons is not sexually differentiated. As such, any sexually dimorphic features of kisspeptin-GPR54 signaling with respect to GnRH neurons most likely result from postsynaptic differences such as kisspeptin innervation (7).

Using conventional voltage-clamp procedures, we found that many GnRH neurons exhibited a marked kisspeptin-induced depolarization without any apparent change in their Rin or I-V relationship. Although about 15% of cells exhibited changes in Rin with I-V curves characteristic of potassium channel closure, and another approximately 15% exhibited features consistent with the opening of a NSC channel, the remainder of GnRH neurons exhibited no change in Rin or I-V relationship during kisspeptin-evoked depolarization. To probe this further, we used barium as a relatively broad-spectrum potassium channel antagonist and found that it was able to block about 40% of the normal number of GnRH neurons from responding to kisspeptin. Similarly, NSC channel blockade with FFA resulted in a significant approximately 40% reduction in the number of responding GnRH neurons. This suggested that barium-sensitive potassium and NSC channels were necessary for kisspeptin-evoked depolarization in many more than the 15% of GnRH neurons indicated by the I-V studies. When both antagonists were added together, we found that nearly 80% of the kisspeptin-responding GnRH neurons were unable to be activated (17% of GnRH neurons responded compared with 75% for controls). Thus, kisspeptin-evoked depolarizations in the great majority of GnRH neurons showing no Rin or I-V change require potassium and/or NSC channels.

The most plausible explanation for these results is that GPR54 activation results in the inhibition of potassium channels as well as the activation of a NSC channel (Fig. 8). As such, the effects of both channels effectively cancel each other

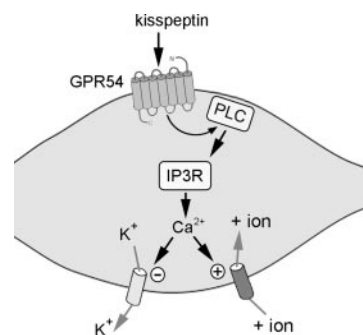

FIG. 8. Schematic diagram showing how kisspeptin activates GnRH neurons. Kisspeptin binds to GPR54, which results in the activation of PLC, which in turn results in the release of calcium from stores after stimulation of IP3R. The released calcium then closes a calcium-sensitive potassium channel and/or opens a calcium-sensitive NSC channel.

out in terms of  $R_{in}$  and result in a depolarization without any I-V reversal. Interestingly, the exact same scenario has been suggested to account for the depolarizing actions of muscarinic receptor activation in locus coeruleus and CA1 hippocampal neurons (30, 31). In those cases, acetylcholine was found to evoke a depolarization without a change in  $R_{in}$ , and as found here, two different I-V relationships suggestive of potassium channel closure and NSC channel opening were encountered. The GnRH neurons rarely respond as a homogeneous population (32), and the present results would suggest a variable balance of potassium *vs.* NSC channel dependence for the kisspeptin responses in individual GnRH neurons. Nevertheless, it is clear that by removing both channels, the great majority of GnRH neurons are prohibited from responding to kisspeptin. The small population of GnRH neurons that respond to kisspeptin in the presence of barium and FFA may represent the activation of yet another ion channel class after GPR54 activation. It seems unlikely that the heterogeneity in GnRH neuron response arises from the GPR54 itself because nearly all GnRH neurons in the adult mouse are reported to express GPR54 mRNA (10).

The prolonged nature of the kisspeptin-induced depolarization and accompanying intense firing is unique to GPR54 activation in GnRH neurons and likely to be important physiologically. Although the prolonged nature of the GnRH neuron response does not appear to fit well with a role for kisspeptin in initiating individual GnRH pulses, it would seem to match the prolonged pattern of GnRH neuron activation suspected to be necessary for ovulation (33, 34). Several studies have suggested that kisspeptin may be involved in the generation of the preovulatory GnRH/LH surge (12–14). For this reason, we were interested in examining the mechanism behind the prolonged depolarization evoked by kisspeptin. We speculated that this may arise from recurrent feedback loops involving GnRH itself or other neurotransmitters. Electron microscopy studies have documented the presence of GnRH terminals synapsing on GnRH neurons (35), and GnRH exerts a depolarizing action upon GnRH neurons (20). Thus, it was plausible that, once activated, GnRH neurons may maintain their activation through collateral reciprocal or even auto-feedback. However, we failed to provide any evidence for this possibility because antide, the GnRH receptor antagonist, had no effect upon the kisspeptin-evoked depolarization. Similarly, and in agreement with the antide result, TTX had no effect, suggesting that recurrent feedback loops and afferent inputs are not necessary. Because GnRH neurons are subjected to considerable action potential-independent amino acid transmission (36), we also examined the effect of glutamate and GABA receptor blockers but, again, found the kisspeptin response to be unchanged. Together, these observations clearly document that the prolonged depolarizing response of GnRH neurons to kisspeptin does not require extrinsic neural components. The identity of the intrinsic mechanism maintaining the kisspeptin depolarization is unknown, but it is interesting to note the transient (2–3 min) nature of the  $[Ca^{2+}]_i$  rise evoked by kisspeptin, suggesting that it may not rely upon prolonged changes in  $[Ca^{2+}]_i$ .

The intracellular pathway underlying the effects of

kisspeptin on GnRH neurons is shown here to involve a PLC-IP3R-calcium cascade. The PLC antagonist U73122 was very effective in blocking GnRH neurons from responding to kisspeptin, whereas its inactive isomer U73343 had no significant effect. Similarly, 2-APB was also very potent in suppressing kisspeptin actions. In accord with these pharmacological studies showing the importance of PLC and IP3R, experiments in Pericam-GnRH neurons demonstrated that kisspeptin quickly elevated  $[Ca^{2+}]_i$  in GnRH neurons. Curiously, the kisspeptin-evoked increase in  $[Ca^{2+}]_i$  was not maintained but terminated after 2–3 min by a sudden fall that resulted in a period of depressed  $[Ca^{2+}]_i$  levels before returning to normal. We believe that this response is not, however, unique to the GPR54 cascade because the exact same profile has been observed after the caffeine-evoked increase in  $[Ca^{2+}]_i$  from calcium stores within GnRH neurons (19). It may, therefore, represent a protective, calcium resetting mechanism triggered by any sudden increase in  $[Ca^{2+}]_i$  within adult GnRH neurons.

The present pharmacological observations in GnRH neurons are in agreement with those found recently for juvenile hypothalamic explants where U73122 and thapsigargin, a calcium store uptake blocker, were effective in suppressing kisspeptin-evoked GnRH secretion (17). In contrast to those experiments, however, the ERK1/2 inhibitor PD98059 was not found to block kisspeptin actions in GnRH neurons suggesting that ERK1/2 signaling elsewhere in the hypothalamus contributes to GnRH release in hypothalamic explants. Interestingly, the effects of kisspeptin in the dentate gyrus of the hippocampus are dependent upon ERK1/2, demonstrating the existence of cell-specific GPR54 signaling cascades within the brain.

Together, we believe that these results provide compelling evidence that kisspeptin binding to GPR54 in GnRH neurons results in the activation of a PLC-IP3R cascade to release calcium from internal stores. The link between the calcium rise and the initial membrane depolarization is very likely to depend upon calcium-sensitive potassium and NSC channels. The precise nature of the barium-sensitive potassium channel underlying this effect is not known. Barium-sensitive, calcium-dependent potassium channels have been reported (37, 38), and calcium-activated small and large conductance potassium channels, SK and BK, respectively, exist in rat and mouse GnRH neurons (39–41). The closure of the SK channel in GnRH neurons would evoke a depolarization (42) consistent with the effects observed for kisspeptin.

Calcium-activated NSC channels have not been demonstrated to exist in GnRH neurons before this report. They comprise a large family of channels well known to be involved in neuronal excitability and the generation of maintained depolarizing responses (22). At RMP, we found that FFA had no consistent effect on membrane excitability itself, suggesting that NSC channels are not tonically active. Whereas NSC channels underlie depolarizing afterpotentials in hypothalamic magnocellular neurons (21, 43), they are not involved in generating afterpotentials in GnRH neurons (44). However, we find here that FFA was able to abolish completely the kisspeptin response in a subpopulation of GnRH neurons, indicating the necessity



for likely calcium-activated NSC channels for kisspeptin responses in these cells.

In summary, using perforated-patch electrophysiology and calcium imaging, we show that kisspeptin exerts its remarkable depolarizing effects upon GnRH neurons by activating a GPR54-PLC-IP3R-calcium cascade that jointly closes potassium channels and opens NSC channels in the majority of cells (Fig. 8). This signaling cascade, which appears to quickly desensitize, initiates a membrane depolarization that is then prolonged by mechanisms intrinsic to the GnRH neuron. Together these observations indicate the presence of a novel G protein-coupled receptor signaling mechanism responsible for the unique and essential role of kisspeptin in the neural control of fertility.

### Note Added in Proof

Using a different electrophysiological approach with a GnRH-GFP transgenic mouse line, Zhang *et al.* (45) have just published the same result reported here that kisspeptin excites GnRH neurons through the activation of a non-selective cation channel and the inhibition of a potassium channel.

### Acknowledgments

We thank Dr. Phil Heyward for advice and discussions related to the electrophysiological experiments.

Received March 7, 2008. Accepted May 6, 2008.

Address all correspondence and requests for reprints to: Allan E. Herbison, Centre for Neuroendocrinology, Department of Physiology, University of Otago School of Medical Sciences, P.O. Box 913, Dunedin, New Zealand. E-mail: allan.herbison@stonebow.otago.ac.nz.

These studies were supported by the New Zealand Marsden Fund and New Zealand Health Research Council.

Disclosure Statement: The authors have nothing to disclose.

### References

- de Roux N, Genin E, Carel JC, Matsuda F, Chaussain JL, Milgrom E 2003 Hypogonadotropic hypogonadism due to loss of function of the Kiss1-derived peptide receptor GPR54. *Proc Natl Acad Sci USA* 100:10972–10976
- Seminara SB, Messager S, Chatzidakis EE, Thresher RR, Acierno Jr JS, Shagoury JK, Bo-Abbas Y, Kuohung W, Schwinof KM, Hendrick AG, Zahn D, Dixon J, Kaiser UB, Slangenahaupt SA, Gusella JF, O'Rahilly S, Carlton MB, Crowley Jr WF, Aparicio SA, Colledge WH 2003 The GPR54 gene as a regulator of puberty. *N Engl J Med* 349:1614–1627
- Messager S, Chatzidakis EE, Ma D, Hendrick AG, Zahn D, Dixon J, Thresher RR, Lomet D, Carlton MB, Colledge WH, Caraty A, Aparicio SA 2005 Kisspeptin directly stimulates gonadotropin-releasing hormone release via G protein-coupled receptor 54. *Proc Natl Acad Sci USA* 102:1761–1766
- Navarro VM, Castellano JM, Fernandez-Fernandez R, Barreiro ML, Roa J, Sanchez-Criado JE, Aguilar E, Dieguez C, Pinilla L, Tena-Sempere M 2004 Developmental and hormonally regulated messenger ribonucleic acid expression of Kiss-1 and its putative receptor, GPR54, in rat hypothalamus and potent luteinizing hormone-releasing activity of Kiss-1 peptide. *Endocrinology* 145:4565–4574
- Gottsch ML, Cunningham MJ, Smith JT, Popa SM, Acohido BV, Crowley WF, Seminara S, Clifton DK, Steiner RA 2004 A role for kisspeptins in the regulation of gonadotropin secretion in the mouse. *Endocrinology* 145:4073–4077
- Shahab M, Mastronardi C, Seminara SB, Crowley WF, Ojeda SR, Plant TM 2005 Increased hypothalamic GPR54 signaling: a potential mechanism for initiation of puberty in primates. *Proc Natl Acad Sci USA* 102:2129–2134
- Clarkson J, Herbison AE 2006 Postnatal development of kisspeptin neurons in mouse hypothalamus; sexual dimorphism and projections to gonadotropin-releasing hormone neurons. *Endocrinology* 147:5817–5825
- Parhar IS, Ogawa S, Sakuma Y 2004 Laser-captured single digoxigenin-labeled neurons of gonadotropin-releasing hormone types reveal a novel G protein-coupled receptor (GPR54) during maturation in cichlid fish. *Endocrinology* 145:3613–3618
- Irwig MS, Fraley GS, Smith JT, Acohido BV, Popa SM, Cunningham MJ, Gottsch ML, Clifton DK, Steiner RA 2004 Kisspeptin activation of gonadotropin releasing hormone neurons and regulation of Kiss-1 mRNA in the male rat. *Neuroendocrinology* 80:264–272
- Han SK, Gottsch ML, Lee KJ, Popa SM, Smith JT, Jakawich SK, Clifton DK, Steiner RA, Herbison AE 2005 Activation of gonadotropin-releasing hormone (GnRH) neurons by kisspeptin as a neuroendocrine switch for the onset of puberty. *J Neurosci* 25:11349–11356
- d'Anglemont de Tassigny X, Fagg LA, Dixon JP, Day K, Leitch HG, Hendrick AG, Zahn D, Franceschini I, Caraty A, Carlton MB, Aparicio SA, Colledge WH 2007 Hypogonadotropic hypogonadism in mice lacking a functional Kiss1 gene. *Proc Natl Acad Sci USA* 104:10714–10719
- Kinoshita M, Tsukamura H, Adachi S, Matsui H, Uenoyama Y, Iwata K, Yamada S, Inoue K, Ohtaki T, Matsumoto H, Maeda K 2005 Involvement of central metastin in the regulation of preovulatory luteinizing hormone surge and estrous cyclicity in female rats. *Endocrinology* 146:4431–4436
- Smith JT, Popa SM, Clifton DK, Hoffman GE, Steiner RA 2006 Kiss1 neurons in the forebrain as central processors for generating the preovulatory luteinizing hormone surge. *J Neurosci* 26:6687–6694
- Adachi S, Yamada S, Takatsu Y, Matsui H, Kinoshita M, Takase K, Sugiura H, Ohtaki T, Matsumoto H, Uenoyama Y, Tsukamura H, Inoue K, Maeda K 2007 Involvement of anteroventral periventricular metastin/kisspeptin neurons in estrogen positive feedback action on luteinizing hormone release in female rats. *J Reprod Dev* 53:367–378
- Kotani M, Dethoux M, Vandenbogaerde A, Communi D, Vanderwinden JM, Le Pou E, Brezillon S, Tyldesley R, Suarez-Huerta N, Vandeput F, Blanpain C, Schiffmann SN, Vassart G, Parmentier M 2001 The metastasis suppressor gene Kiss-1 encodes kisspeptins, the natural ligands of the orphan G protein-coupled receptor GPR54. *J Biol Chem* 276:34631–34636
- Muir AI, Chamberlain L, Elshourbagy NA, Michalovich D, Moore DJ, Calamari A, Szekeres PG, Sarau HM, Chambers JK, Murdock P, Steplewski K, Shabon U, Miller JE, Middleton SE, Darker JG, Larmine CG, Wilson S, Bergsma DJ, Emson P, Faull R, Philpott KL, Harrison DC 2001 AXOR12, a novel human G protein-coupled receptor, activated by the peptide KiSS-1. *J Biol Chem* 276:28969–28975
- Castellano JM, Navarro VM, Fernandez-Fernandez R, Castano JP, Malagon MM, Aguilar E, Dieguez C, Magni P, Pinilla L, Tena-Sempere M 2006 Ontogeny and mechanisms of action for the stimulatory effect of kisspeptin on gonadotropin-releasing hormone system of the rat. *Mol Cell Endocrinol* 257–258:75–83
- Spergel DJ, Kruth U, Hanley DF, Sprengel R, Seeburg PH 1999 GABA- and glutamate-activated channels in green fluorescent protein-tagged gonadotropin-releasing hormone neurons in transgenic mice. *J Neurosci* 19:2037–2050
- Jasoni CL, Todman MG, Strumia MM, Herbison AE 2007 Cell type-specific expression of a genetically encoded calcium indicator reveals intrinsic calcium oscillations in adult gonadotropin-releasing hormone neurons. *J Neurosci* 27:860–867
- Todman MG, Han SK, Herbison AE 2005 Profiling neurotransmitter receptor expression in mouse gonadotropin-releasing hormone neurons using green fluorescent protein-promoter transgenics and microarrays. *Neuroscience* 132:703–712
- Ghamari-Langroudi M, Bourque CW 2002 Flufenamic acid blocks depolarizing afterpotentials and phasic firing in rat supraoptic neurones. *J Physiol* 545:537–542
- Partridge LD, Muller TH, Swandulla D 1994 Calcium-activated non-selective channels in the nervous system. *Brain Res Rev* 19:319–325
- Bleasdale JE, Thakur NR, Gremban RS, Bundy G, Fitzpatrick FA, Smith RJ, Bunting S 1990 Selective inhibition of receptor-coupled phospholipase C-dependent processes in human platelets and polymorphonuclear neutrophils. *J Pharmacol Exp Ther* 255:756–768
- Maruyama T, Kanaji T, Nakade S, Kanno T, Mikoshiba K 1997 2-APB, 2-aminoethoxydiphenyl borate, a membrane-penetrable modulator of Ins(1,4,5)P<sub>3</sub>-induced Ca<sup>2+</sup> release. *J Biochem* 122:498–505
- Alessi DR, Cuenda A, Cohen P, Dudley DT, Saltiel AR 1995 PD 098059 is a specific inhibitor of the activation of mitogen-activated protein kinase kinase in vitro and in vivo. *J Biol Chem* 270:27489–27494
- Pielecka-Fortuna J, Chu Z, Moenter SM 2008 Kisspeptin acts directly and indirectly to increase GnRH neuron activity and its effects are modulated by estradiol. *Endocrinology* 149:1979–1986
- Plant TM, Ramaswamy S, Dipietro MJ 2006 Repetitive activation of hypothalamic G protein-coupled receptor 54 with intravenous pulses of kisspeptin in the juvenile monkey (*Macaca mulatta*) elicits a sustained train of gonadotropin-releasing hormone discharges. *Endocrinology* 147:1007–1013
- Clarkson J, Herbison AE 2006 Development of GABA and glutamate signaling at the GnRH neuron in relation to puberty. *Mol Cell Endocrinol* 254–255:32–38
- Kauffman AS, Gottsch ML, Roa J, Byquist AC, Crown A, Clifton DK, Hoffman GE, Steiner RA, Tena-Sempere M 2007 Sexual differentiation of Kiss1 gene expression in the brain of the rat. *Endocrinology* 148:1774–1783
- McQuiston AR, Madison DV 1999 Muscarinic receptor activity has multiple effects on the resting membrane potentials of CA1 hippocampal interneurons. *J Neurosci* 19:5693–5702
- Shen KZ, North RA 1992 Muscarine increases cation conductance and decreases potassium conductance in rat locus coeruleus neurones. *J Physiol* 455:471–485

32. **Herbison AE** 2006 Physiology of the GnRH neuronal network. In: Neill JD, ed. Knobil and Neill's physiology of reproduction. 3rd ed. San Diego: Academic Press; 1415–1482
33. **Karsch FJ, Bowen JM, Caraty A, Evans NP, Moenter SM** 1997 Gonadotropin-releasing hormone requirements for ovulation. *Biol Reprod* 56:303–309
34. **Caraty A, Delaleu B, Chesneau D, Fabre-Nys C** 2002 Sequential role of E2 and GnRH for the expression of estrous behavior in ewes. *Endocrinology* 143:139–145
35. **Silverman A, Livne I, Witkin JW** 1994 The gonadotrophin-releasing hormone (GnRH), neuronal systems: immunocytochemistry and in situ hybridization. In: Knobil E, Neill JD, eds. *The physiology of reproduction*. 2nd ed. New York: Raven; 1683–1706
36. **Sim JA, Skynner MJ, Pape JR, Herbison AE** 2000 Late postnatal reorganization of GABA<sub>A</sub> receptor signalling in native GnRH neurons. *Eur J Neurosci* 12:3497–3504
37. **Hehl S, Moser C, Weik R, Neumcke B** 1994 Internal Ca<sup>2+</sup> ions inactivate and modify ATP-sensitive potassium channels in adult mouse skeletal muscle. *Biochim Biophys Acta* 1190:257–263
38. **Selyanko AA, Sim JA** 1998 Ca<sup>2+</sup>-inhibited non-inactivating K<sup>+</sup> channels in cultured rat hippocampal pyramidal neurones. *J Physiol* 510(Pt 1):71–91
39. **Hiraizumi Y, Nishimura I, Ishii H, Tanaka N, Takeshita T, Sakuma Y, Kato M** 2008 Rat GnRH neurons exhibit large conductance voltage- and Ca<sup>2+</sup>-activated K<sup>+</sup> (BK) currents and express BK channel mRNAs. *J Physiol Sci* 58:21–29
40. **Kato M, Tanaka N, Usui S, Sakuma Y** 2006 The SK channel blocker apamin inhibits slow afterhyperpolarization currents in rat gonadotropin-releasing hormone neurones. *J Physiol* 574:431–442
41. **Spergel DJ** 2007 Calcium and small-conductance calcium-activated potassium channels in gonadotropin-releasing hormone neurons before, during, and after puberty. *Endocrinology* 148:2383–2390
42. **Liu X, Herbison AE** 2008 Small-conductance calcium-activated potassium (SK) channels control excitability and firing dynamics in gonadotropin-releasing hormone (GnRH) neurons. *Endocrinology* 149:3598–3604
43. **Teruyama R, Armstrong WE** 2007 Calcium-dependent fast depolarizing afterpotentials in vasopressin neurons in the rat supraoptic nucleus. *J Neurophysiol* 98:2612–2621
44. **Chu Z, Moenter SM** 2006 Physiologic regulation of a tetrodotoxin-sensitive sodium influx that mediates a slow afterdepolarization potential in gonadotropin-releasing hormone neurons: possible implications for the central regulation of fertility. *J Neurosci* 26:11961–11973
45. **Zhang C, Roepke TA, Kelly MJ, Ronnekleiv OK** 2008 Kisspeptin depolarizes gonadotropin-releasing hormone neurons through activation of TRPC-like cationic channels. *J Neurosci* 28:4423–4434

*Endocrinology* is published monthly by The Endocrine Society (<http://www.endo-society.org>), the foremost professional society serving the endocrine community.
